# Supplementary material
Source: Elsevier journal article supplement (https://www.sciencedirect.com/science/article/pii/S1697260018301509)
Supplement: mmc1 [file S1697260018301509:mmc1.docx]

**Appendix.** Child-to-Parent Violence Questionnaire (CPV-Q).

Please indicate how often you have carried out each of the following behaviours against your father or your mother in the past year.

0 = Never 1 = Rarely (It has occurred once) 2 = Sometimes (2-3 times) 3 = Many times (4-5 times) 4 = Very often (6 times or more)

|  | FATHER | | | | | MOTHER | | | | |
| --- | --- | --- | --- | --- | --- | --- | --- | --- | --- | --- |
| 1. I have told my parents, "I hate you!" "I wish you were dead". | 0 | 1 | 2 | 3 | 4 | 0 | 1 | 2 | 3 | 4 |
| 1. I have insulted my parents. | 0 | 1 | 2 | 3 | 4 | 0 | 1 | 2 | 3 | 4 |
| 1. I have made negative, offensive and/or degrading comments to my parents. | 0 | 1 | 2 | 3 | 4 | 0 | 1 | 2 | 3 | 4 |
| 1. I have threatened my parents (with hurting them, with hurting myself, with running away from home...). | 0 | 1 | 2 | 3 | 4 | 0 | 1 | 2 | 3 | 4 |
| 1. At home, we watch what I want on TV. | 0 | 1 | 2 | 3 | 4 | 0 | 1 | 2 | 3 | 4 |
| 1. I have demanded my parents to buy me things even knowing they cannot afford it. | 0 | 1 | 2 | 3 | 4 | 0 | 1 | 2 | 3 | 4 |
| 1. I have acquired debts that my parents have had to pay. | 0 | 1 | 2 | 3 | 4 | 0 | 1 | 2 | 3 | 4 |
| 1. I have thrown things at my parents. | 0 | 1 | 2 | 3 | 4 | 0 | 1 | 2 | 3 | 4 |
| 1. When I argue with my parents, I have the last word. | 0 | 1 | 2 | 3 | 4 | 0 | 1 | 2 | 3 | 4 |
| 1. I have hit my parents with something that could hurt them. | 0 | 1 | 2 | 3 | 4 | 0 | 1 | 2 | 3 | 4 |
| 1. I have kicked, slapped, and/or punched my parents. | 0 | 1 | 2 | 3 | 4 | 0 | 1 | 2 | 3 | 4 |
| 1. I have stolen money from my parents. | 0 | 1 | 2 | 3 | 4 | 0 | 1 | 2 | 3 | 4 |
| 1. I have demanded my parents that at home they have to do what I want. | 0 | 1 | 2 | 3 | 4 | 0 | 1 | 2 | 3 | 4 |
| 1. I have demanded my parents to stop what they are doing to pay attention to me. | 0 | 1 | 2 | 3 | 4 | 0 | 1 | 2 | 3 | 4 |

If you have carried out any of the aforementioned behaviours, please indicate the frequency of the reasons for behaving in that way.

0: Never 1: Sometimes 2: Almost always 3: Always

| 1. To be able to come home later when you go out at night. | 0 | 1 | 2 | 3 |
| --- | --- | --- | --- | --- |
| 2. To get more money from your father/mother. | 0 | 1 | 2 | 3 |
| 3. To get your father/mother to buy you something that you want. | 0 | 1 | 2 | 3 |
| 4. To avoid doing some chore (e.g., cleaning up your room). | 0 | 1 | 2 | 3 |
| 5. To avoid going to school and/or studying. | 0 | 1 | 2 | 3 |
| 6. Because of your own temper. | 0 | 1 | 2 | 3 |
| 7. In response to a previous physical aggression from your father/mother (e.g., slap, punch, shove...). | 0 | 1 | 2 | 3 |
| 8. In response to a previous verbal aggression from your father /mother (e.g., insult). | 0 | 1 | 2 | 3 |
